# Supplementary material for: Synapsin-Promoted Caveolin-1 Overexpression Maintains Mitochondrial Morphology and Function in PSAPP Alzheimer’s Disease Mice
Source: MDPI journal article supplement (doi:10.3390/cells10092487), 2021-09-20

Supplemental Figures

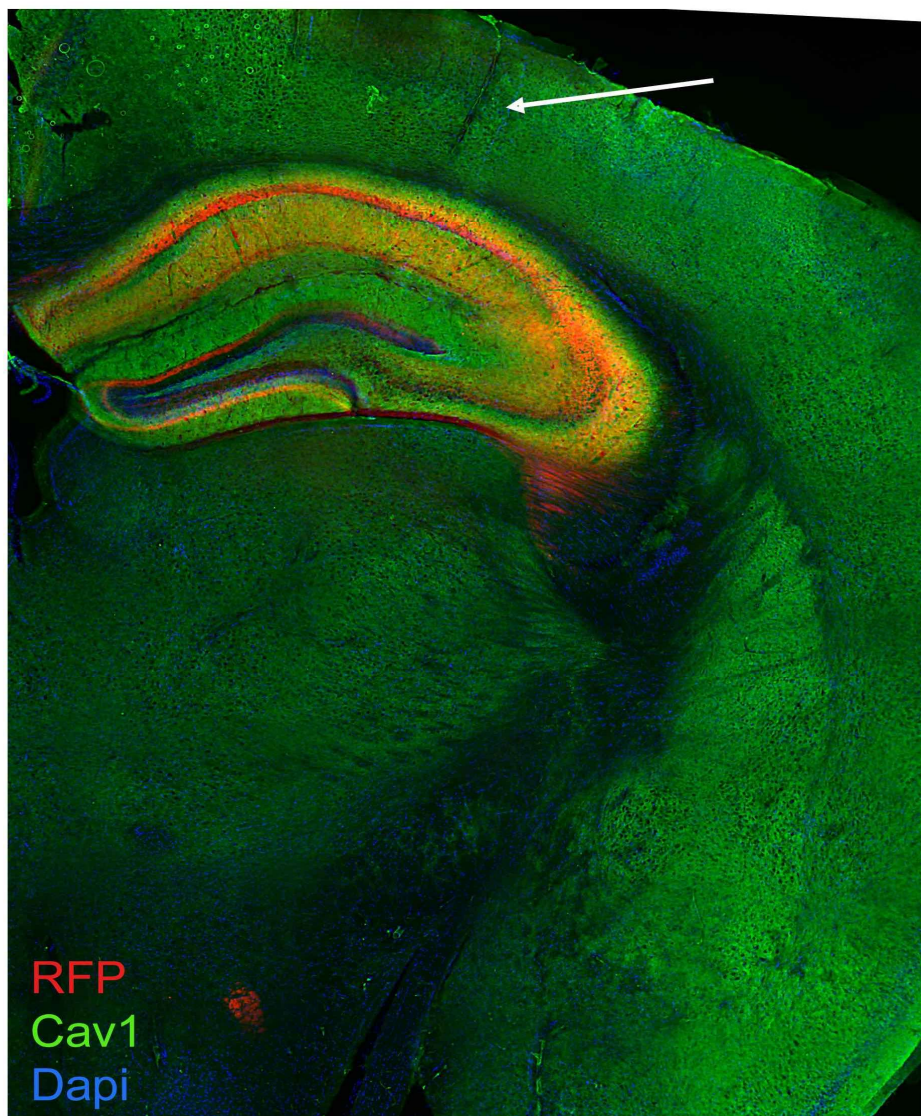

**Supplement Figure S1.** Representative image of stereo-microinjection of WT-SynRFP at 12m age. Arrow indicates needle track of original injection site.

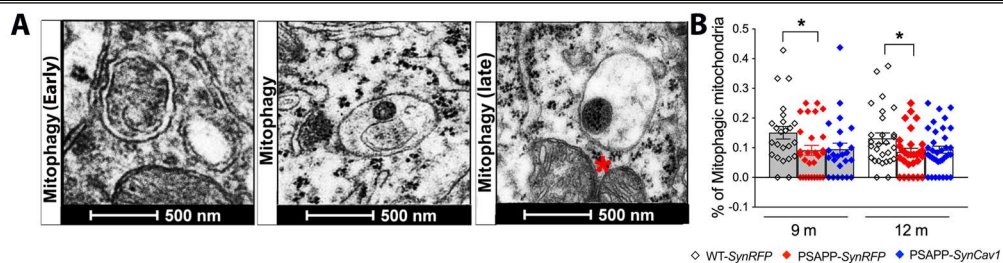

**Supplement Figure S2.** Analysis of mitophagy via EM. (A) Representative images of mitophagy. (B) Quantification of mitophagy event at both 9 and 12 months of age. Both PSAPP-SynRFP ( $p=0.03$  at 9 and 12 months) and PSAPP-SynCav1 ( $p=0.051$  at 9 months,  $p=0.059$  at 12 months) group showed lower mitophagy activity compared to WT, no significant change was found between two PSAPP groups. Data are presented as mean  $\pm$  S.E.M.,  $n = 5-6$  per group. Data were analyzed using one-way analysis of variance (ANOVA) followed by Tukey multiple comparisons test. Significance was assumed when  $p < 0.05$ . \* $p < 0.05$ .

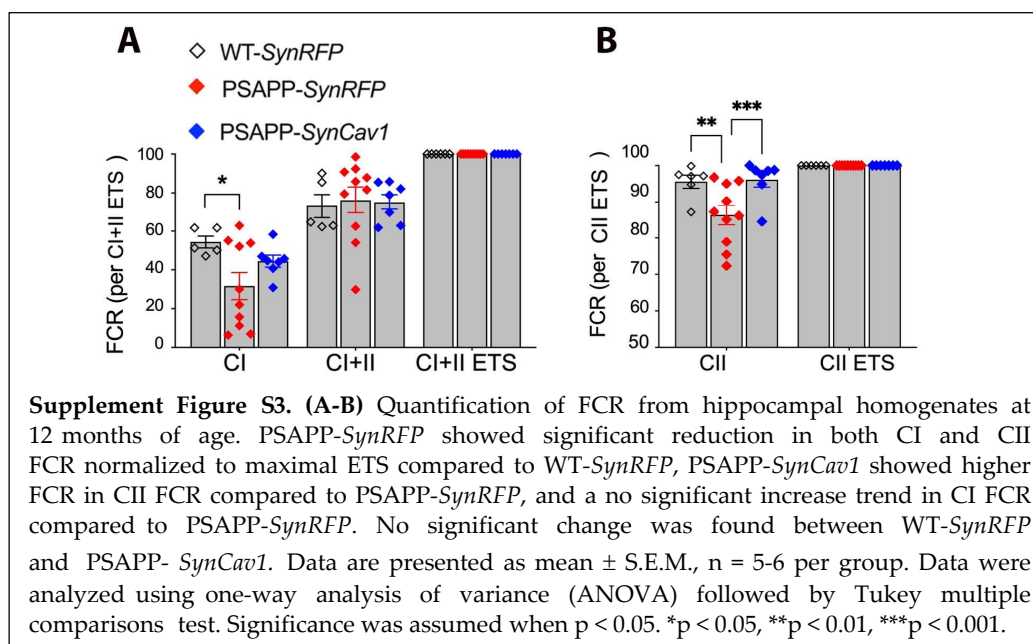

Supplement: s1 [file s1]
